# Supplementary material for: Efficient genome editing of differentiated renal epithelial cells
Source: PubMed Central journal article supplement (PMC5222933; doi:10.1007/s00424-016-1924-4), 2016-12-16

# Supplementary Figure 1

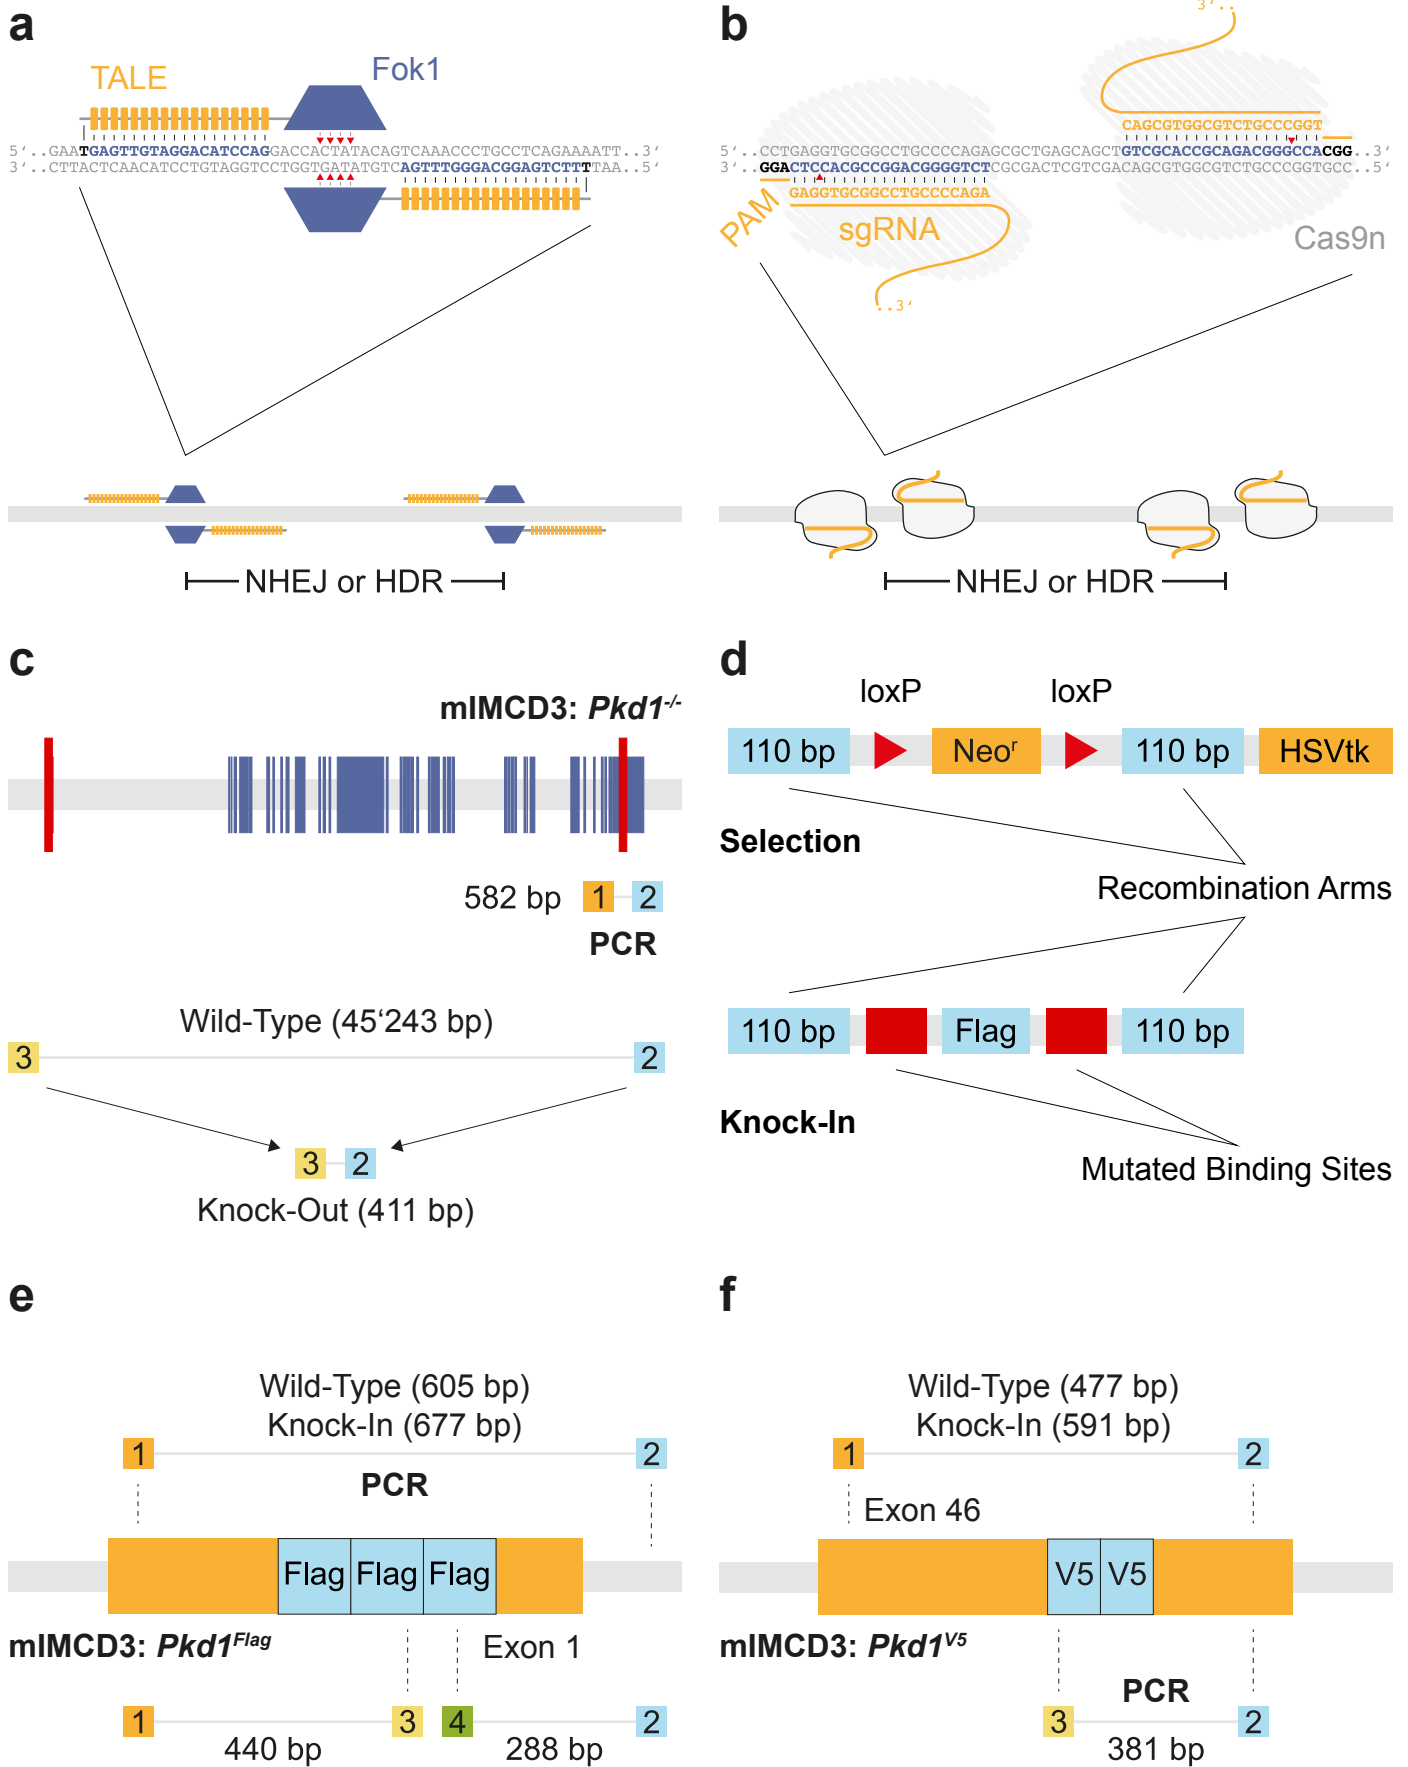

# Supplementary Figure 2

**a**

*mouse Lama5*

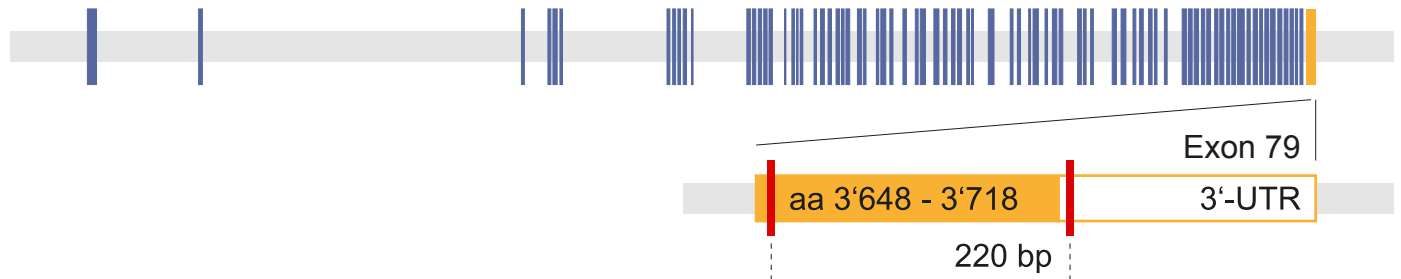

**b**

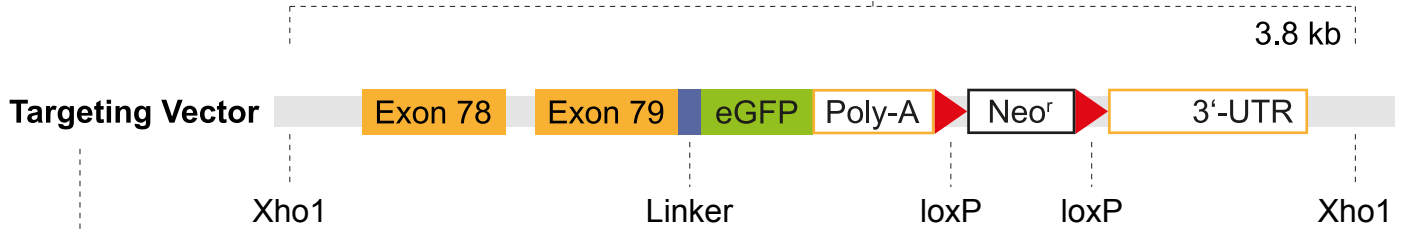

**c**

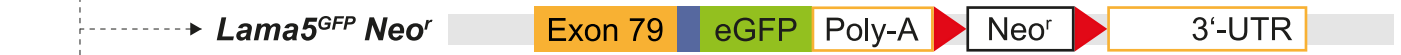

**d**

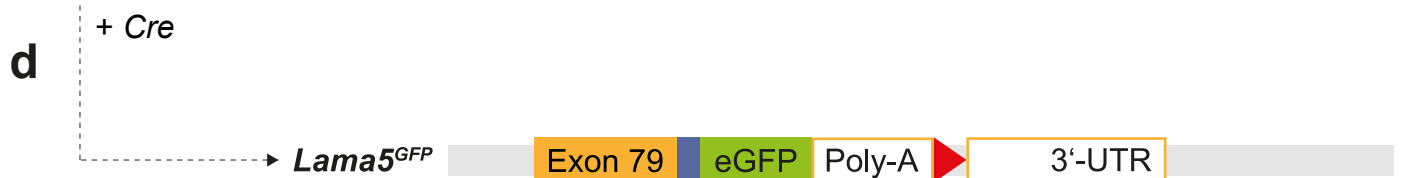

Supplement: 424_2016_1924_MOESM1_ESM.pdf [file 424_2016_1924_MOESM1_ESM.pdf]
