# Supplementary material for: Efficient genome editing of differentiated renal epithelial cells
Source: PubMed Central journal article supplement (PMC5222933; doi:10.1007/s00424-016-1924-4), 2016-12-16
Supplement: 424_2016_1924_MOESM2_ESM.pdf [file 424_2016_1924_MOESM2_ESM.pdf]

**Supplementary Table 1 - Cell lines.**

| <b>Mouse Inner Medullary Collecting Duct 3 cell lines (mIMCD3)</b> |                    |                                                                                                                                                 |                             |                             |
|--------------------------------------------------------------------|--------------------|-------------------------------------------------------------------------------------------------------------------------------------------------|-----------------------------|-----------------------------|
| <b>Name</b>                                                        | <b>Gene/s</b>      | <b>Reference Alleles</b>                                                                                                                        | <b>Clones<sup>-/-</sup></b> | <b>Clones<sup>+/-</sup></b> |
| Pkd1                                                               | <i>Pkd1</i>        | Δ Chr. 17: 24'550'055 - 24'594'963 /<br>Δ Chr. 17: 24'550'106 - 24'594'903                                                                      | 3                           |                             |
| Pkd1 <sup>Rescue</sup>                                             | <i>Pkd1</i>        | Δ Chr. 17: 24'550'055 - 24'594'963 /<br>Δ Chr. 17: 24'550'106 - 24'594'903 ;<br>Tg(Pkd1)                                                        | 1                           |                             |
| Pkd1 <sup>Flag</sup>                                               | <i>Pkd1</i>        | Tg(3×Flag) after Chr. 17: 24'550'343                                                                                                            | 2                           | 5                           |
| Pkd1 <sup>V5</sup>                                                 | <i>Pkd1</i>        | Tg(2×V5) after Chr. 17: 24'588'581                                                                                                              |                             | 3                           |
| Pkd2                                                               | <i>Pkd2</i>        | Δ Chr. 5: 104'478'281 - 104'490'878                                                                                                             | 4                           |                             |
| Pkd2 <sup>Rescue</sup>                                             | <i>Pkd2</i>        | Δ Chr. 5: 104'478'281 - 104'490'878 ;<br>Tg(PKD2)                                                                                               | 1                           |                             |
| Pkd-dKO                                                            | <i>Pkd1 + Pkd2</i> | Δ Chr. 5: 104'478'281 - 104'490'878 ;<br>Δ Chr. 17: 24'550'042 - 24'594'890 /<br>Δ Chr. 17: 24'550'106 - 24'594'903                             | 3                           |                             |
| Pkd-dKO <sup>Rescue</sup>                                          | <i>Pkd1 + Pkd2</i> | Δ Chr. 5: 104'478'281 - 104'490'878 ;<br>Δ Chr. 17: 24'550'042 - 24'594'890 /<br>Δ Chr. 17: 24'550'106 - 24'594'903 ;<br>Tg(Pkd1) ;<br>Tg(PKD2) | 1                           |                             |
| Lama5 <sup>GFP</sup>                                               | <i>Lama5</i>       | Tg(GFP) after Chr. 2: 180'176'550                                                                                                               |                             | 3                           |
| <b>Madin-Darby Canine Kidney cell lines (MDCK)</b>                 |                    |                                                                                                                                                 |                             |                             |
| <b>Name</b>                                                        | <b>Gene/s</b>      | <b>Reference Alleles</b>                                                                                                                        | <b>Clones<sup>-/-</sup></b> | <b>Clones<sup>+/-</sup></b> |
| Pkd1                                                               | <i>Pkd1</i>        | Δ Chr. 6: 38'836'147 - 38'865'462                                                                                                               | 5                           | 1                           |
| Pkd1 <sup>Rescue</sup>                                             | <i>Pkd1</i>        | Δ Chr. 6: 38'836'147 - 38'865'462 ;<br>Tg(Pkd1)                                                                                                 | 1                           |                             |
| Pkd2                                                               | <i>Pkd2</i>        | Δ Chr. 32: 11'381'232 - 11'438'424                                                                                                              | 2                           | 2                           |
| Pkd2 <sup>Rescue</sup>                                             | <i>Pkd2</i>        | Δ Chr. 32: 11'381'232 - 11'438'424 ;<br>Tg(PKD2)                                                                                                | 1                           |                             |

**Supplementary Table 2 - TALEN and sgRNA binding sites.**

| <b>Mouse Inner Medullary Collecting Duct 3 cells (mIMCD3)</b> |             |                                |                      |
|---------------------------------------------------------------|-------------|--------------------------------|----------------------|
| <b>Target</b>                                                 | <b>Type</b> | <b>Name</b>                    | <b>Binding site</b>  |
| <i>Pkd1</i>                                                   | CRISPR      | mPkd1_sgRNA_1                  | TCTGGGGCAGGCCGCACCTC |
|                                                               |             | mPkd1_sgRNA_2                  | GTCGCACCGCAGACGGGCCA |
|                                                               |             | mPkd1_sgRNA_3                  | AGAGCTCGCCACGCAAGGCG |
|                                                               |             | mPkd1_sgRNA_4                  | ACCCCAGGACTATGAGATGG |
| <i>Pkd1<sup>Flag</sup></i>                                    | CRISPR      | mPkd1 <sup>Flag</sup> _sgRNA_1 | CGAGCCACAGGCCCAGGCCT |
|                                                               |             | mPkd1 <sup>Flag</sup> _sgRNA_2 | GAGACCCTGGGCGCGGCTGC |
|                                                               |             | mPkd1 <sup>Flag</sup> _sgRNA_3 | GCGCAGGGCCGCAAAAGCAG |
|                                                               |             | mPkd1 <sup>Flag</sup> _sgRNA_4 | GCGTCAATTGCTCCGGCCGC |
| <i>Pkd1<sup>V5</sup></i>                                      | CRISPR      | mPkd1 <sup>V5</sup> _sgRNA_1   | AATAACAAGGTCCACCCCAG |
|                                                               |             | mPkd1 <sup>V5</sup> _sgRNA_2   | CCTAATAACAAGGTCCACCC |
| <i>Pkd2</i>                                                   | TALEN       | mPkd2_TALEN_1                  | CAGTAAATGCAGAGAGGA   |
|                                                               |             | mPkd2_TALEN_2                  | ACATGTAGAGTCAGTCCA   |
|                                                               |             | mPkd2_TALEN_3                  | CTCTCATGCTTGATCACC   |
|                                                               |             | mPkd2_TALEN_4                  | TCTGCTTTTCATAGGTTA   |
| <i>Lama5</i>                                                  | TALEN       | mLama5_TALEN_1                 | TCATAGAAAGTGTAGGCA   |
|                                                               |             | mLama5_TALEN_2                 | TTGGCATTGAGGGTTCCC   |
|                                                               |             | mLama5_TALEN_3                 | CGGTAGGCAGGGAGCTCT   |
|                                                               |             | mLama5_TALEN_4                 | CTGTATTTTCAGAGTCTT   |
| <b>Madin-Darby Canine Kidney cells (MDCK)</b>                 |             |                                |                      |
| <b>Target</b>                                                 | <b>Type</b> | <b>Name</b>                    | <b>Binding site</b>  |
| <i>Pkd1</i>                                                   | TALEN       | cPkd1_TALEN_1                  | GCTGGTTGCCGTGAGACC   |
|                                                               |             | cPkd1_TALEN_2                  | GCTTCACCCTGCAGACCT   |
|                                                               |             | cPkd1_TALEN_3                  | GGCCACAGTTACAGCCTT   |
|                                                               |             | cPkd1_TALEN_4                  | TATTTGACTTTGTCTGGGT  |
| <i>Pkd2</i>                                                   | TALEN       | cPkd2_TALEN_1                  | TTTAAGGTA ACTAAGTTA  |
|                                                               |             | cPkd2_TALEN_2                  | TGGATTCTGGCCTATTCT   |
|                                                               |             | cPkd2_TALEN_3                  | TGGTAAGTTGCCAATCAA   |
|                                                               |             | cPkd2_TALEN_4                  | TCCCATCAGATCAAAGTG   |

**Supplementary Table 3 - Genotyping of mIMCD3 cell lines.**

| <b>Mouse Inner Medullary Collecting Duct 3 cell lines (mIMCD3)</b> |              |                           |                        |
|--------------------------------------------------------------------|--------------|---------------------------|------------------------|
| <b>Feature</b>                                                     | <b>Name</b>  | <b>Oligonucleotide</b>    | <b>Product (bp)</b>    |
| <b><i>Pkd1</i></b>                                                 | mPkd1_1      | AGATGGCCATCCTGGTAGGT      | 582                    |
|                                                                    | mPkd1_2      | CTAGGTGGGAGCACAACCTGG     |                        |
| <b><i>Pkd1<sup>-/-</sup></i></b>                                   | mPkd1_3      | CCACCTACAGCCAACCTTGGGA    | 45'243 (wt)            |
|                                                                    | mPkd1_2      | CTAGGTGGGAGCACAACCTGG     | 300 + 411 (-/-)        |
| <b><i>Pkd1<sup>Flag</sup></i></b>                                  | mPkd1-Flag_1 | CCACCTACAGCCAACCTTGGGA    | 605 (wt)<br>677 (Flag) |
|                                                                    | mPkd1-Flag_2 | CCCAGTCATGATGCTCTAGCC     |                        |
|                                                                    | mPkd1-Flag_1 | CCACCTACAGCCAACCTTGGGA    | 440                    |
|                                                                    | mPkd1-Flag_3 | GTCCTTGTCATCGTCGTCCT      |                        |
|                                                                    | mPkd1-Flag_4 | GACTACAAGGACGACGATGA      | 288                    |
|                                                                    | mPkd1-Flag_2 | CCCAGTCATGATGCTCTAGCC     |                        |
| <b><i>Pkd1<sup>V5</sup></i></b>                                    | mPkd1-V5_1   | GAGCAACAACCTCCAGAGCCT     | 477 (wt)<br>591 (V5)   |
|                                                                    | mPkd1-V5_2   | GCTGGGTACTCACTTGGTCC      |                        |
|                                                                    | mPkd1-V5_2   | GCTGGGTACTCACTTGGTCC      | 381                    |
|                                                                    | mPkd1-V5_3   | GGTGGTGGCAAACCCATA        |                        |
| <b><i>Pkd2</i></b>                                                 | mPkd2_1      | TTAGTAAGCGCGTGTCCA        | 476                    |
|                                                                    | mPkd2_2      | ACTGAGGCAAACCTGCCAT       |                        |
| <b><i>Pkd2<sup>-/-</sup></i></b>                                   | mPkd2_3      | TATGGCAGGTCCCTGTGG        | 12'895 (wt)            |
|                                                                    | mPkd2_2      | ACTGAGGCAAACCTGCCAT       | 296 (-/-)              |
| <b><i>Lama5</i></b>                                                | mLama5_1     | TGGAGGTAGACACACAGAGCAACC  | 788 (wt)               |
|                                                                    | mLama5_2     | CCGTCCCCAAGTTGGAATTG      | 568 (deletion)         |
| <b><i>Lama5<sup>GFP</sup></i></b>                                  | mLama5-GFP_1 | GCAGTGAGGGAGTTGTCACATTAGG | 1'138                  |
|                                                                    | mLama5-GFP_2 | AACTTCAGGGTCAGCTTGCCGTAG  |                        |
|                                                                    | mLama5-GFP_3 | AGACTGCCTTGGGAAAAGCG      | 1'041                  |
|                                                                    | mLama5-GFP_4 | CCTTGCCAATGCAGACGTTT      |                        |

**Supplementary Table 4 - Genotyping of MDCK cell lines.**

| <b>Madin-Darby Canine Kidney cell lines (MDCK)</b> |             |                        |                     |
|----------------------------------------------------|-------------|------------------------|---------------------|
| <b>Feature</b>                                     | <b>Name</b> | <b>Oligonucleotide</b> | <b>Product (bp)</b> |
| <b><i>Pkd1</i></b>                                 | cPkd1_1     | TGGAGCTGTTAGGTGTCC     | 1'040               |
|                                                    | cPkd1_2     | CCACTGCCTGCCCTTCGA     |                     |
| <b><i>Pkd1<sup>-/-</sup></i></b>                   | cPkd1_1     | TGGAGCTGTTAGGTGTCC     | 30'323 (wt)         |
|                                                    | cPkd1_3     | CCCTGGAGGGCTCTCTGC     | 1'007 (-/-)         |
| <b><i>Pkd2</i></b>                                 | cPkd2_1     | ACAGGAGTCAGAGTGCTG     | 861                 |
|                                                    | cPkd2_2     | ACCTGTGTGCCTTACCCA     |                     |
| <b><i>Pkd2<sup>-/-</sup></i></b>                   | cPkd2_3     | ACAAAGGATGCTGTCCGG     | 57'725 (wt)         |
|                                                    | cPkd2_2     | ACCTGTGTGCCTTACCCA     | 532 (-/-)           |

**Supplementary Table 5 - Oligonucleotides for RT-PCR.**

| <b>Mouse Inner Medullary Collecting Duct 3 cell lines (mIMCD3)</b> |             |                            |                     |
|--------------------------------------------------------------------|-------------|----------------------------|---------------------|
| <b>mRNA</b>                                                        | <b>Name</b> | <b>Oligonucleotide</b>     | <b>Product (bp)</b> |
| <b>36b4</b>                                                        | RT_m36b4_1  | CCGATCTGCAGACACACACT       | 91                  |
|                                                                    | RT_m36b4_2  | ACCCTGAAGTGCTCGACATC       |                     |
| <b>Pkd1</b>                                                        | RT_mPkd1_1  | GTGGAAAGCAGGTCGGAAG        | 236                 |
|                                                                    | RT_mPkd1_2  | TCGTCTCGTTCAGCACCAG        |                     |
| <b>Pkd2</b>                                                        | RT_mPkd2_1  | GTGGATGTACACAAGTGAGAAGGAGC | 454                 |
|                                                                    | RT_mPkd2_2  | CACGACAATCACAAATCCAGACA    |                     |
| <b>Madin-Darby Canine Kidney cell lines (MDCK)</b>                 |             |                            |                     |
| <b>mRNA</b>                                                        | <b>Name</b> | <b>Oligonucleotide</b>     | <b>Product (bp)</b> |
| <b>Gapdh</b>                                                       | RT_cGapdh_1 | CATGTTTGTGATGGGCGTGAACCA   | 100                 |
|                                                                    | RT_cGapdh_2 | TTTGGCTAGAGGAGCCAAGCAGTT   |                     |
| <b>Hprt1</b>                                                       | RT_cHprt_1  | TCCATTCCTATGACTGTAG        | 189                 |
|                                                                    | RT_cHprt_1  | ATTATGCTCCTTGACCAA         |                     |
| <b>Pkd1</b>                                                        | RT_cPkd1_1  | TTCTGCTGGTCTCCTCCTGT       | 270                 |
|                                                                    | RT_cPkd1_2  | GCAGAAAGAGCTCCACCATC       |                     |
| <b>Pkd2</b>                                                        | RT_cPkd2_1  | CCAGCCGAGAGAAGTATC         | 142                 |
|                                                                    | RT_cPkd2_2  | AAGAAGAGTTGTGACATTATCC     |                     |

**Supplementary Table 6** - Polycystin-1<sup>Flag</sup> nano-LC-MS/MS peptide data.

| <b>Mouse Inner Medullary Collecting Duct 3 (mIMCD3) <i>Pkd1</i><sup>Flag</sup></b> |                            |                        |
|------------------------------------------------------------------------------------|----------------------------|------------------------|
| <b>#</b>                                                                           | <b>Unique PC1 Peptides</b> | <b>Position in PC1</b> |
| 1                                                                                  | WLQTLGPSLR                 | 55 - 64                |
| 2                                                                                  | EHQVHVQSEATTCR             | 142 - 156              |
| 3                                                                                  | EAFLTAAEFSTQKLEEPAQMR      | 585 - 605              |
| 4                                                                                  | LEEPAQMR                   | 598 - 605              |
| 5                                                                                  | LTPLLGLGPNPGLQHPGHYEVR     | 772 - 793              |
| 6                                                                                  | ATVGNSVSR                  | 794 - 802              |
| 7                                                                                  | VLQGILVR                   | 939 - 946              |
| 8                                                                                  | YSPMVEAGSDVAFR             | 947 - 960              |
| 9                                                                                  | SGIFPLALVLSSHVNK           | 1'346 - 1'361          |
| 10                                                                                 | VSGWNEVSR                  | 1'521 - 1'529          |
| 11                                                                                 | TSMPSTTHTFAAPGLHLVR        | 1'759 - 1'777          |
| 12                                                                                 | VGDHLVNVQAENHVSHAQAQVR     | 1'939 - 1'960          |
| 13                                                                                 | VQGDSLVLISGR               | 2'009 - 2'020          |
| 14                                                                                 | FEAATSPSPR                 | 2'075 - 2'084          |
| 15                                                                                 | NYLEAHVDLR                 | 2'163 - 2'172          |
| 16                                                                                 | LVPIIEGGSYR                | 2'252 - 2'262          |
| 17                                                                                 | VWSDTQDLVLDGSK             | 2'263 - 2'276          |
| 18                                                                                 | GSSVVTIPLER                | 2'315 - 2'325          |
| 19                                                                                 | AQAVYEVSRR                 | 2'371 - 2'379          |
| 20                                                                                 | DAEDGGAPLVYALLK            | 2'496 - 2'511          |
| 21                                                                                 | VLNNEPLTLAGEEIVALGK        | 2'763 - 2'781          |
| 22                                                                                 | VASMAFQTQTGTQIPIEQLAAER    | 2'843 - 2'865          |
| 23                                                                                 | ITYTVLNER                  | 2'916 - 2'924          |
| 24                                                                                 | ISLEVLEGADHR               | 2'955 - 2'966          |
| 25                                                                                 | LLVAELQR                   | 3'240 - 3'247          |
